# Supplementary material
Source: PubMed Central journal article supplement (PMC6933764)
Supplement: ao9b03210_si_001.pdf [file ao9b03210_si_001.pdf]

## **Supporting information**

**The impact of hydro-priming and osmo-priming on seedling characteristics, plant hormone concentrations, activity of selected hydrolytic enzymes and cell wall and phytate hydrolysis in sprouted wheat (*Triticum aestivum* L.)”**

**Elien Lemmens<sup>\*1</sup>, Lomme J. Deleu<sup>1</sup>, Niels De Brier<sup>1a</sup>, Wannes L. De Man<sup>1</sup>, Maurice De Proft<sup>2</sup>, Els Prinsen<sup>3</sup>, and Jan A. Delcour<sup>1</sup>**

<sup>1</sup>Laboratory of Food Chemistry and Biochemistry, and Leuven Food Science and Nutrition Research Centre (LFoRCe), KU Leuven, Kasteelpark Arenberg 20, B-3001 Leuven, Belgium.

<sup>2</sup>Division of Crop Biotechnics, KU Leuven, Leuven, Belgium.

<sup>3</sup>Department of Biology, University of Antwerp, Antwerp, Belgium

\*Corresponding author. Phone: (+32)-16-374242. Fax: (+32)-16-321997.

E-mail: [elien.lemmens1@kuleuven.be](mailto:elien.lemmens1@kuleuven.be)

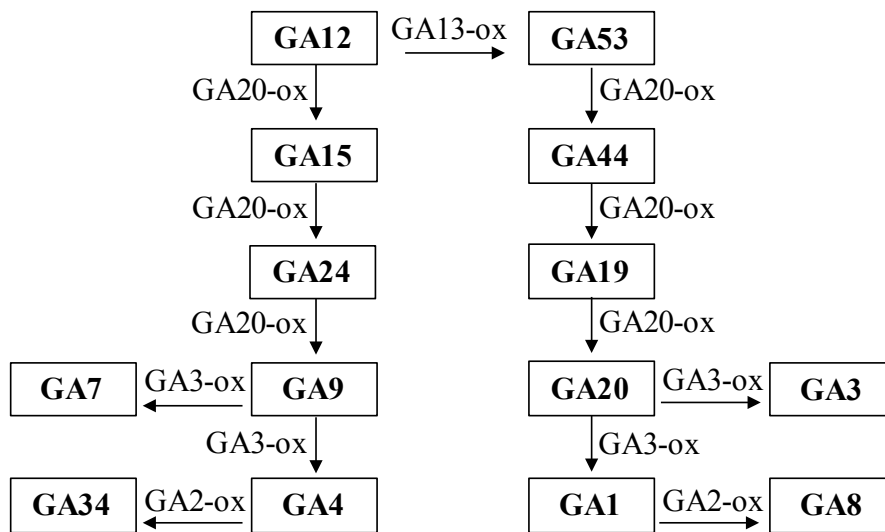

Figure S1 Part of the gibberellic acid (GA) biosynthesis pathway mentioning the GA-oxidases (GA-ox) responsible for every conversion step.
